# Supplementary material
Source: PubMed Central journal article supplement (PMC4023222)
Supplement: ejhg2013248x2.pdf [file ejhg2013248x2.pdf]

|    | Gene     | RegionCount | MeanSD   |
|----|----------|-------------|----------|
| 1  | 6-Mar    | 26          | 0.118458 |
| 2  | 7a5      | 13          | 0.123552 |
| 3  | ACOX1    | 117         | 0.121447 |
| 4  | ASF1A_   | 78          | 0.121565 |
| 5  | ASF1B_   | 78          | 0.128876 |
| 6  | CHKB     | 13          | 0.114389 |
| 7  | CPT1A    | 240         | 0.128075 |
| 8  | CPT1B    | 91          | 0.143536 |
| 9  | CPT1C    | 143         | 0.130248 |
| 10 | CPT2     | 65          | 0.12207  |
| 11 | CROT     | 244         | 0.131834 |
| 12 | CYorf15A | 48          | 0.19355  |
| 13 | DDX3Y    | 96          | 0.232991 |
| 14 | EHMT1    | 12          | 0.113581 |
| 15 | EHMT2    | 13          | 0.149666 |
| 16 | EIF1AY   | 74          | 0.242426 |
| 17 | GOLGA7   | 65          | 0.139392 |
| 18 | HUWE1    | 744         | 0.181612 |
| 19 | JARID1D  | 156         | 0.237649 |
| 20 | MGMT_    | 96          | 0.128489 |
| 21 | NA       | 10307       | 0.137147 |
| 22 | NLGN4Y   | 128         | 0.241675 |
| 23 | NP1L2    | 60          | 0.203483 |
| 24 | NPM2     | 78          | 0.127199 |
| 25 | PB1      | 407         | 0.136595 |
| 26 | PCDH11Y  | 6           | 0.205321 |
| 27 | PPT1     | 104         | 0.1262   |
| 28 | PPT2     | 104         | 0.129506 |
| 29 | PRKY     | 65          | 0.229613 |
| 30 | RBBP4    | 104         | 0.132024 |
| 31 | RBMY1F   | 12          | 0.21469  |
| 32 | RPS4Y1   | 72          | 0.335238 |
| 33 | RSF1     | 204         | 0.133979 |
| 34 | SPTLC1   | 168         | 0.129204 |
| 35 | SPTLC2   | 144         | 0.1263   |
| 36 | SPTLC3   | 26          | 0.140921 |
| 37 | SRY      | 12          | 0.25643  |
| 38 | SUMO1_   | 76          | 0.14105  |
| 39 | SUMO2    | 65          | 0.129477 |
| 40 | SUMO3    | 91          | 0.130151 |
| 41 | SUMO4    | 39          | 0.11583  |
| 42 | TAF6L    | 96          | 0.117153 |
| 43 | TBL1Y    | 185         | 0.20465  |
| 44 | TTY10    | 26          | 0.223093 |
| 45 | TTY11    | 55          | 0.253509 |
| 46 | TTY14    | 19          | 0.218619 |

|    |           |     |          |
|----|-----------|-----|----------|
| 47 | TTY6      | 12  | 0.216575 |
| 48 | USP9Y     | 446 | 0.210164 |
| 49 | UTY       | 292 | 0.226799 |
| 50 | ZDHC9     | 120 | 0.196    |
| 51 | ZFY       | 84  | 0.192559 |
| 52 | a2bp1     | 247 | 0.137274 |
| 53 | abat      | 221 | 0.129889 |
| 54 | abca13    | 26  | 0.111676 |
| 55 | abcb5     | 13  | 0.125743 |
| 56 | abcc1     | 13  | 0.152401 |
| 57 | abcc8     | 360 | 0.133584 |
| 58 | abcc9     | 12  | 0.131082 |
| 59 | abcd3     | 193 | 0.145138 |
| 60 | abi1      | 156 | 0.131514 |
| 61 | ablim1    | 312 | 0.126907 |
| 62 | acads     | 36  | 0.133897 |
| 63 | acat1     | 132 | 0.140356 |
| 64 | acat2     | 117 | 0.135936 |
| 65 | accn2     | 96  | 0.137361 |
| 66 | aclt6a    | 26  | 0.11219  |
| 67 | aclt6b    | 26  | 0.128259 |
| 68 | acmsd     | 13  | 0.122417 |
| 69 | acsl4     | 162 | 0.174681 |
| 70 | actl6a    | 117 | 0.139337 |
| 71 | actl6b    | 65  | 0.132203 |
| 72 | actl7a    | 24  | 0.13624  |
| 73 | actl7b    | 36  | 0.118572 |
| 74 | actl8     | 60  | 0.129458 |
| 75 | actr6     | 10  | 0.162978 |
| 76 | acvr2a    | 13  | 0.144547 |
| 77 | adam22    | 377 | 0.131053 |
| 78 | adcy1     | 13  | 0.129596 |
| 79 | adcyap1   | 39  | 0.125017 |
| 80 | adcyap1r1 | 169 | 0.140185 |
| 81 | add1      | 13  | 0.130036 |
| 82 | add2      | 208 | 0.128408 |
| 83 | add3      | 36  | 0.127987 |
| 84 | adora1    | 78  | 0.14153  |
| 85 | adra2a    | 12  | 0.129122 |
| 86 | adsl      | 143 | 0.131447 |
| 87 | adssl1    | 12  | 0.157652 |
| 88 | aebp1     | 13  | 0.151711 |
| 89 | aebp2     | 12  | 0.126245 |
| 90 | aff2      | 228 | 0.185377 |
| 91 | aga       | 116 | 0.142809 |
| 92 | agtr2     | 24  | 0.1674   |
| 93 | ahcy      | 104 | 0.133131 |

|     |          |     |          |
|-----|----------|-----|----------|
| 94  | ak1      | 84  | 0.138918 |
| 95  | akap5    | 12  | 0.118926 |
| 96  | akap9    | 591 | 0.145628 |
| 97  | akr1b1   | 13  | 0.120576 |
| 98  | aldh18a1 | 195 | 0.12793  |
| 99  | aldh3a2  | 13  | 0.133549 |
| 100 | aldoa    | 78  | 0.121509 |
| 101 | aldoc    | 26  | 0.135211 |
| 102 | alf      | 13  | 0.118828 |
| 103 | alg5     | 12  | 0.144691 |
| 104 | alg9     | 161 | 0.132911 |
| 105 | alkbh3   | 12  | 0.112051 |
| 106 | alkbh8   | 12  | 0.120786 |
| 107 | alpp12   | 13  | 0.139702 |
| 108 | als2     | 13  | 0.127416 |
| 109 | als2cr11 | 13  | 0.131053 |
| 110 | ampd2    | 13  | 0.164399 |
| 111 | amph     | 273 | 0.135887 |
| 112 | anapc7   | 12  | 0.139276 |
| 113 | ankmy1   | 13  | 0.137031 |
| 114 | anks1b   | 332 | 0.13509  |
| 115 | aof2     | 228 | 0.13198  |
| 116 | aox1     | 13  | 0.139895 |
| 117 | ap1g1    | 13  | 0.140117 |
| 118 | ap1s2    | 48  | 0.155827 |
| 119 | ap3b1    | 336 | 0.143871 |
| 120 | apba1    | 156 | 0.124461 |
| 121 | apba2    | 12  | 0.139357 |
| 122 | aprin    | 9   | 0.141364 |
| 123 | ar       | 108 | 0.178552 |
| 124 | arc      | 39  | 0.127805 |
| 125 | arf3     | 48  | 0.128044 |
| 126 | arf5     | 13  | 0.139192 |
| 127 | arfgef2  | 442 | 0.130079 |
| 128 | arhgap19 | 13  | 0.116016 |
| 129 | arhgap24 | 13  | 0.108805 |
| 130 | arhgef6  | 264 | 0.187384 |
| 131 | arid1a   | 192 | 0.125081 |
| 132 | arid1b   | 121 | 0.137775 |
| 133 | arid2    | 204 | 0.129684 |
| 134 | arid3a   | 156 | 0.13598  |
| 135 | arid3b   | 108 | 0.125015 |
| 136 | arid3c   | 78  | 0.118455 |
| 137 | arid4a   | 266 | 0.138134 |
| 138 | arid4b   | 310 | 0.142793 |
| 139 | arid5a   | 78  | 0.122201 |
| 140 | arid5b   | 143 | 0.12416  |

|     |           |     |          |
|-----|-----------|-----|----------|
| 141 | arpc1a    | 123 | 0.128663 |
| 142 | arpc1b    | 104 | 0.129082 |
| 143 | arpc4     | 78  | 0.127529 |
| 144 | arsa      | 13  | 0.143746 |
| 145 | arsb      | 117 | 0.129259 |
| 146 | arx       | 60  | 0.154154 |
| 147 | asah1     | 143 | 0.130935 |
| 148 | asph      | 26  | 0.163601 |
| 149 | aspm      | 305 | 0.142808 |
| 150 | ass       | 192 | 0.139973 |
| 151 | atg16l1   | 13  | 0.131423 |
| 152 | atn1      | 84  | 0.128541 |
| 153 | atp13a4   | 349 | 0.132351 |
| 154 | atp1a2    | 156 | 0.138702 |
| 155 | atp2b4    | 273 | 0.129088 |
| 156 | atp5j2    | 52  | 0.127129 |
| 157 | atp6v1c1  | 13  | 0.120771 |
| 158 | atp7a     | 254 | 0.179276 |
| 159 | atp8a2    | 36  | 0.1243   |
| 160 | atr       | 554 | 0.138019 |
| 161 | atrx      | 392 | 0.169148 |
| 162 | azin1     | 13  | 0.122461 |
| 163 | baiap2    | 208 | 0.140918 |
| 164 | baz1a     | 301 | 0.145863 |
| 165 | baz1b     | 273 | 0.128365 |
| 166 | baz2a     | 180 | 0.122281 |
| 167 | baz2b     | 456 | 0.140202 |
| 168 | bckdhb    | 13  | 0.113652 |
| 169 | bcr       | 13  | 0.122767 |
| 170 | bdnf      | 72  | 0.151119 |
| 171 | bid       | 13  | 0.126583 |
| 172 | bin1      | 13  | 0.134799 |
| 173 | blk       | 13  | 0.137897 |
| 174 | blm       | 245 | 0.136413 |
| 175 | bmp3      | 13  | 0.127028 |
| 176 | boll      | 13  | 0.122728 |
| 177 | braf      | 228 | 0.144026 |
| 178 | brca1     | 299 | 0.135578 |
| 179 | brca2     | 269 | 0.136851 |
| 180 | brcc3     | 132 | 0.186234 |
| 181 | bscl2     | 72  | 0.13305  |
| 182 | bsn       | 117 | 0.12782  |
| 183 | btaf1     | 13  | 0.158538 |
| 184 | bud31     | 52  | 0.14048  |
| 185 | bzw1      | 13  | 0.124959 |
| 186 | c10orf137 | 12  | 0.123431 |
| 187 | c10orf38  | 104 | 0.134034 |

|     |          |     |          |
|-----|----------|-----|----------|
| 188 | c10orf4  | 13  | 0.147119 |
| 189 | c10orf61 | 13  | 0.13418  |
| 190 | c13orf23 | 12  | 0.11291  |
| 191 | c14orf73 | 12  | 0.125205 |
| 192 | c17orf41 | 5   | 0.161521 |
| 193 | c1orf107 | 143 | 0.128921 |
| 194 | c1orf125 | 13  | 0.197674 |
| 195 | c1orf24  | 13  | 0.134263 |
| 196 | c1orf25  | 13  | 0.149453 |
| 197 | c1orf62  | 13  | 0.144374 |
| 198 | c1orf74  | 26  | 0.118779 |
| 199 | c20orf94 | 93  | 0.12697  |
| 200 | c3orf34  | 39  | 0.136846 |
| 201 | c3orf43  | 39  | 0.111123 |
| 202 | c5orf25  | 13  | 0.110185 |
| 203 | c6orf155 | 13  | 0.131493 |
| 204 | c6orf157 | 13  | 0.127665 |
| 205 | c6orf72  | 13  | 0.15572  |
| 206 | c7orf10  | 13  | 0.125334 |
| 207 | c7orf11  | 26  | 0.133116 |
| 208 | c7orf26  | 78  | 0.131799 |
| 209 | c7orf28b | 143 | 0.140133 |
| 210 | c7orf38  | 26  | 0.127961 |
| 211 | c9orf21  | 12  | 0.128034 |
| 212 | ca2      | 91  | 0.135726 |
| 213 | ca9      | 13  | 0.124674 |
| 214 | cacna1e  | 13  | 0.13565  |
| 215 | cacnb2   | 26  | 0.127225 |
| 216 | cacng2   | 52  | 0.136379 |
| 217 | cacng3   | 52  | 0.119241 |
| 218 | cacng4   | 52  | 0.149961 |
| 219 | cacng7   | 65  | 0.135502 |
| 220 | cacng8   | 52  | 0.133696 |
| 221 | calb1    | 104 | 0.133785 |
| 222 | calb2    | 104 | 0.137862 |
| 223 | cald1    | 39  | 0.122743 |
| 224 | camk2a   | 208 | 0.13937  |
| 225 | camk2b   | 221 | 0.134209 |
| 226 | capn1    | 132 | 0.130935 |
| 227 | capn10   | 13  | 0.132348 |
| 228 | carm1    | 142 | 0.135235 |
| 229 | casp7    | 12  | 0.125113 |
| 230 | casp8    | 13  | 0.130278 |
| 231 | cbs      | 182 | 0.14157  |
| 232 | cbx1     | 91  | 0.128457 |
| 233 | cbx2     | 78  | 0.127491 |
| 234 | cbx3     | 93  | 0.152016 |

|     |          |     |          |
|-----|----------|-----|----------|
| 235 | cbx4     | 78  | 0.14093  |
| 236 | cbx5     | 84  | 0.134796 |
| 237 | cbx6     | 52  | 0.124377 |
| 238 | cbx7     | 104 | 0.1319   |
| 239 | cbx8     | 52  | 0.127901 |
| 240 | cc2d1a   | 169 | 0.129716 |
| 241 | ccdc112  | 13  | 0.175208 |
| 242 | ccdc120  | 12  | 0.218159 |
| 243 | ccdc98   | 9   | 0.176213 |
| 244 | ccdc99   | 13  | 0.143903 |
| 245 | ccna1    | 12  | 0.13272  |
| 246 | ccnh     | 13  | 0.142475 |
| 247 | cdc215   | 13  | 0.148163 |
| 248 | cdh11    | 156 | 0.135569 |
| 249 | cdh2     | 195 | 0.128663 |
| 250 | cdh26    | 13  | 0.170182 |
| 251 | cdk5     | 52  | 0.133539 |
| 252 | cdk5r1   | 26  | 0.117236 |
| 253 | cdkl5    | 251 | 0.184024 |
| 254 | cdr1     | 12  | 0.224561 |
| 255 | cecr1    | 13  | 0.115457 |
| 256 | cecr2    | 13  | 0.161586 |
| 257 | cenpj    | 12  | 0.149545 |
| 258 | centa2   | 13  | 0.118171 |
| 259 | cep350   | 13  | 0.114592 |
| 260 | cerkl    | 39  | 0.135657 |
| 261 | chd1     | 390 | 0.138633 |
| 262 | chd1l    | 323 | 0.134171 |
| 263 | chd2     | 445 | 0.129356 |
| 264 | chd3     | 191 | 0.128592 |
| 265 | chd4     | 180 | 0.122484 |
| 266 | chd5     | 337 | 0.130485 |
| 267 | chd6     | 481 | 0.127823 |
| 268 | chd7     | 377 | 0.124211 |
| 269 | chd8     | 276 | 0.136006 |
| 270 | chd9     | 464 | 0.134041 |
| 271 | chdh     | 143 | 0.135696 |
| 272 | chkb     | 13  | 0.120924 |
| 273 | chl1     | 335 | 0.138584 |
| 274 | chmp4c   | 13  | 0.131309 |
| 275 | chrac1   | 65  | 0.128446 |
| 276 | chrfam7a | 99  | 0.141793 |
| 277 | chrn1    | 24  | 0.136003 |
| 278 | chrna4   | 65  | 0.132941 |
| 279 | chrnd    | 13  | 0.171647 |
| 280 | chst7    | 24  | 0.161557 |
| 281 | cit      | 468 | 0.130525 |

|     |         |     |          |
|-----|---------|-----|----------|
| 282 | cldn14  | 13  | 0.178376 |
| 283 | cldn23  | 13  | 0.138402 |
| 284 | clgn    | 9   | 0.175859 |
| 285 | clk1    | 13  | 0.131558 |
| 286 | cltc    | 272 | 0.133963 |
| 287 | cltcl1  | 13  | 0.133814 |
| 288 | cluap1  | 5   | 0.153148 |
| 289 | cmyma5  | 13  | 0.146623 |
| 290 | cnbd1   | 13  | 0.129173 |
| 291 | cngb3   | 13  | 0.132014 |
| 292 | cnot4   | 13  | 0.143284 |
| 293 | cntn4   | 312 | 0.139781 |
| 294 | cntnap2 | 312 | 0.131088 |
| 295 | col11a1 | 13  | 0.122574 |
| 296 | col12a1 | 39  | 0.131958 |
| 297 | col28a1 | 13  | 0.119153 |
| 298 | col6a2  | 13  | 0.139528 |
| 299 | col6a3  | 104 | 0.131486 |
| 300 | colec12 | 13  | 0.139583 |
| 301 | cops8   | 13  | 0.145378 |
| 302 | coro2a  | 12  | 0.126095 |
| 303 | cort    | 26  | 0.135401 |
| 304 | cplx2   | 13  | 0.119348 |
| 305 | cplx3   | 12  | 0.108151 |
| 306 | cpne3   | 26  | 0.124536 |
| 307 | cpsf4   | 78  | 0.126451 |
| 308 | crbn    | 130 | 0.136796 |
| 309 | crebbp  | 388 | 0.123566 |
| 310 | crhr1   | 91  | 0.140672 |
| 311 | crisp1  | 13  | 0.13631  |
| 312 | crisp2  | 13  | 0.133447 |
| 313 | crmp1   | 13  | 0.142472 |
| 314 | cryl1   | 12  | 0.117992 |
| 315 | csmd1   | 26  | 0.12668  |
| 316 | cspg2   | 26  | 0.117766 |
| 317 | ctnna2  | 234 | 0.131834 |
| 318 | ctnnb1  | 104 | 0.12422  |
| 319 | ctnnd2  | 273 | 0.129048 |
| 320 | ctsb    | 13  | 0.128863 |
| 321 | cttn    | 192 | 0.134513 |
| 322 | cubn    | 26  | 0.162407 |
| 323 | cugbp2  | 13  | 0.112238 |
| 324 | cul4b   | 228 | 0.175471 |
| 325 | cxorf31 | 48  | 0.195118 |
| 326 | cyb5r3  | 91  | 0.133849 |
| 327 | cyfip1  | 324 | 0.126337 |
| 328 | cyfip2  | 416 | 0.132893 |

|     |            |     |          |
|-----|------------|-----|----------|
| 329 | cyp20a1    | 13  | 0.131539 |
| 330 | cyp27a1    | 52  | 0.134046 |
| 331 | cyp2c18    | 13  | 0.187583 |
| 332 | cyp3a4     | 150 | 0.141777 |
| 333 | cyp3a43    | 169 | 0.130919 |
| 334 | cyp3a5     | 156 | 0.138035 |
| 335 | cyp3a7     | 156 | 0.140018 |
| 336 | d2hgdh     | 130 | 0.142928 |
| 337 | d4s234e    | 65  | 0.130781 |
| 338 | dact2      | 13  | 0.143176 |
| 339 | daglbeta   | 156 | 0.126405 |
| 340 | dbn1       | 104 | 0.136862 |
| 341 | dcamkl1    | 12  | 0.125667 |
| 342 | dclre1c    | 9   | 0.150921 |
| 343 | dcp2       | 13  | 0.112111 |
| 344 | dcx        | 96  | 0.203709 |
| 345 | ddx5       | 13  | 0.163041 |
| 346 | dffb       | 13  | 0.15296  |
| 347 | dgkd       | 13  | 0.146694 |
| 348 | dhcr7      | 108 | 0.139233 |
| 349 | dhx9       | 1   | 0.165082 |
| 350 | dkfzp761i2 | 13  | 0.130317 |
| 351 | dld        | 141 | 0.153733 |
| 352 | dlg1       | 309 | 0.150892 |
| 353 | dlg2       | 276 | 0.132241 |
| 354 | dlg3       | 132 | 0.20046  |
| 355 | dlg4       | 104 | 0.128602 |
| 356 | dlgap1     | 143 | 0.132528 |
| 357 | dlk1       | 12  | 0.139393 |
| 358 | dmap1      | 65  | 0.140141 |
| 359 | dmd        | 972 | 0.180987 |
| 360 | dmx1       | 39  | 0.137897 |
| 361 | dnah11     | 13  | 0.127914 |
| 362 | dnah7      | 13  | 0.120715 |
| 363 | dnm1       | 168 | 0.13415  |
| 364 | dnmt1      | 390 | 0.128622 |
| 365 | dnmt3a     | 250 | 0.125085 |
| 366 | dnmt3b     | 286 | 0.129101 |
| 367 | dnmt3l     | 156 | 0.137245 |
| 368 | dock4      | 13  | 0.122991 |
| 369 | dopey1     | 13  | 0.138659 |
| 370 | dpyd       | 299 | 0.133204 |
| 371 | dpys       | 130 | 0.128416 |
| 372 | dpysl2     | 169 | 0.131664 |
| 373 | drd1       | 26  | 0.12938  |
| 374 | drd2       | 96  | 0.137754 |
| 375 | duox1      | 12  | 0.121879 |



|     |          |     |          |
|-----|----------|-----|----------|
| 376 | dusp21   | 12  | 0.197271 |
| 377 | dusp5    | 12  | 0.121991 |
| 378 | dusp9    | 12  | 0.166823 |
| 379 | dym      | 217 | 0.133157 |
| 380 | dync1h1  | 36  | 0.13226  |
| 381 | dync2h1  | 12  | 0.144825 |
| 382 | dyrk1a   | 195 | 0.130032 |
| 383 | dyrk2    | 60  | 0.121138 |
| 384 | ecat8    | 12  | 0.194952 |
| 385 | edd1     | 26  | 0.120346 |
| 386 | edil3    | 26  | 0.138096 |
| 387 | efhc2    | 12  | 0.192696 |
| 388 | ehmt1    | 300 | 0.130387 |
| 389 | eif2ak1  | 173 | 0.127681 |
| 390 | eif2ak3  | 198 | 0.137501 |
| 391 | elf1     | 12  | 0.143706 |
| 392 | elf2     | 13  | 0.122297 |
| 393 | elovl4   | 13  | 0.13378  |
| 394 | emx2     | 36  | 0.121282 |
| 395 | enosf1   | 13  | 0.14568  |
| 396 | ep300    | 403 | 0.129421 |
| 397 | epb41l1  | 273 | 0.137638 |
| 398 | epb41l4a | 13  | 0.141689 |
| 399 | ephb2    | 192 | 0.136906 |
| 400 | erbb4    | 364 | 0.136543 |
| 401 | ercc2    | 117 | 0.137098 |
| 402 | ercc5    | 132 | 0.124243 |
| 403 | ercc6    | 234 | 0.132272 |
| 404 | ercc8    | 156 | 0.139277 |
| 405 | esco2    | 136 | 0.134482 |
| 406 | esr1     | 130 | 0.124307 |
| 407 | exoc4    | 247 | 0.131667 |
| 408 | exoc6    | 13  | 0.10862  |
| 409 | exoc7    | 117 | 0.125543 |
| 410 | ext2     | 12  | 0.135755 |
| 411 | ezh2     | 247 | 0.128731 |
| 412 | fabp4    | 13  | 0.115312 |
| 413 | falz     | 315 | 0.138464 |
| 414 | fam102b  | 13  | 0.138413 |
| 415 | fam107b  | 13  | 0.111161 |
| 416 | fam13a1  | 13  | 0.124512 |
| 417 | fam48a   | 60  | 0.150249 |
| 418 | fam53b   | 12  | 0.138143 |
| 419 | fam76b   | 12  | 0.140332 |
| 420 | fance    | 180 | 0.124377 |
| 421 | fancc    | 364 | 0.139988 |
| 422 | fancd2   | 91  | 0.129855 |

|     |          |     |          |
|-----|----------|-----|----------|
| 423 | fbp2     | 12  | 0.128889 |
| 424 | fbxl17   | 13  | 0.136457 |
| 425 | fbxo45   | 39  | 0.128393 |
| 426 | fbxw10   | 5   | 0.181457 |
| 427 | fbxw11   | 26  | 0.12513  |
| 428 | fbxw5    | 12  | 0.131699 |
| 429 | fcer2    | 13  | 0.152366 |
| 430 | fer1l3   | 39  | 0.137482 |
| 431 | fgd1     | 120 | 0.174816 |
| 432 | fgd4     | 180 | 0.134435 |
| 433 | fgf9     | 12  | 0.117779 |
| 434 | fgfr2    | 216 | 0.124349 |
| 435 | fgfr3    | 78  | 0.115622 |
| 436 | fgfrl1   | 13  | 0.123025 |
| 437 | fkrp     | 52  | 0.130649 |
| 438 | flj10847 | 13  | 0.146848 |
| 439 | flj10925 | 13  | 0.130407 |
| 440 | flj14834 | 12  | 0.117027 |
| 441 | flj20125 | 13  | 0.140011 |
| 442 | flj23834 | 13  | 0.133544 |
| 443 | flj25801 | 26  | 0.132541 |
| 444 | flj32810 | 12  | 0.11985  |
| 445 | flj35740 | 4   | 0.194171 |
| 446 | flj36180 | 13  | 0.120101 |
| 447 | flj37953 | 13  | 0.118817 |
| 448 | flj39660 | 13  | 0.129486 |
| 449 | flj43374 | 13  | 0.11676  |
| 450 | flj44385 | 13  | 0.154971 |
| 451 | flj45964 | 13  | 0.119319 |
| 452 | flt1     | 12  | 0.131646 |
| 453 | flt3     | 12  | 0.131147 |
| 454 | fmr1     | 156 | 0.172714 |
| 455 | fnta     | 52  | 0.137376 |
| 456 | foxn4    | 12  | 0.148113 |
| 457 | fras1    | 39  | 0.126023 |
| 458 | frem2    | 24  | 0.119098 |
| 459 | freq     | 84  | 0.120532 |
| 460 | fry      | 36  | 0.127966 |
| 461 | fshr     | 13  | 0.14198  |
| 462 | ftsj1    | 60  | 0.170003 |
| 463 | fuca1    | 84  | 0.122711 |
| 464 | fundc2   | 59  | 0.192279 |
| 465 | fyn      | 182 | 0.12788  |
| 466 | g0s2     | 13  | 0.116508 |
| 467 | gabra5   | 12  | 0.116669 |
| 468 | gabrb2   | 13  | 0.136158 |
| 469 | gabrg2   | 13  | 0.127063 |

|     |        |     |          |
|-----|--------|-----|----------|
| 470 | gad2   | 13  | 0.182945 |
| 471 | gal    | 60  | 0.135448 |
| 472 | gale   | 36  | 0.114064 |
| 473 | gamt   | 39  | 0.137397 |
| 474 | gap43  | 39  | 0.140893 |
| 475 | gas2l3 | 3   | 0.162316 |
| 476 | gata5  | 13  | 0.11696  |
| 477 | gatm   | 108 | 0.122014 |
| 478 | gcn5l2 | 78  | 0.129373 |
| 479 | gcnt3  | 12  | 0.121297 |
| 480 | gdi1   | 48  | 0.155257 |
| 481 | gfra1  | 12  | 0.137999 |
| 482 | ggh    | 13  | 0.14981  |
| 483 | gipc1  | 13  | 0.135422 |
| 484 | git1   | 78  | 0.123915 |
| 485 | glb1   | 195 | 0.135652 |
| 486 | glcci1 | 13  | 0.145946 |
| 487 | gli3   | 208 | 0.131145 |
| 488 | glul   | 13  | 0.126255 |
| 489 | gnai1  | 90  | 0.142925 |
| 490 | gnao1  | 130 | 0.13395  |
| 491 | gnaq   | 84  | 0.134229 |
| 492 | gnas   | 104 | 0.1261   |
| 493 | gnb2l1 | 78  | 0.123428 |
| 494 | gnpat  | 169 | 0.133697 |
| 495 | gnptab | 192 | 0.125811 |
| 496 | gopc   | 117 | 0.129245 |
| 497 | gpam   | 12  | 0.119915 |
| 498 | gpc1   | 13  | 0.1228   |
| 499 | gpr17  | 13  | 0.129451 |
| 500 | gpsm2  | 156 | 0.131416 |
| 501 | grb2   | 78  | 0.126392 |
| 502 | gria1  | 208 | 0.13289  |
| 503 | gria2  | 182 | 0.136401 |
| 504 | gria3  | 216 | 0.202064 |
| 505 | gria4  | 190 | 0.141123 |
| 506 | grid2  | 208 | 0.137071 |
| 507 | grik1  | 234 | 0.137785 |
| 508 | grik2  | 212 | 0.139589 |
| 509 | grik3  | 208 | 0.142566 |
| 510 | grik4  | 228 | 0.13724  |
| 511 | grik5  | 156 | 0.128824 |
| 512 | grin1  | 120 | 0.135382 |
| 513 | grin2a | 169 | 0.127749 |
| 514 | grin2b | 144 | 0.127033 |
| 515 | grin2c | 117 | 0.137075 |
| 516 | grin2d | 117 | 0.139505 |

|     |          |     |          |
|-----|----------|-----|----------|
| 517 | grin3a   | 108 | 0.125673 |
| 518 | grin3b   | 52  | 0.130571 |
| 519 | grip1    | 288 | 0.128871 |
| 520 | grip2    | 286 | 0.137172 |
| 521 | gripap1  | 180 | 0.193101 |
| 522 | grm1     | 104 | 0.121637 |
| 523 | grm2     | 52  | 0.127248 |
| 524 | grm3     | 78  | 0.123945 |
| 525 | grm4     | 117 | 0.133115 |
| 526 | grm5     | 73  | 0.126415 |
| 527 | grm7     | 182 | 0.132065 |
| 528 | grm8     | 95  | 0.135621 |
| 529 | gsk3b    | 151 | 0.138118 |
| 530 | gss      | 143 | 0.13595  |
| 531 | gtf2i    | 391 | 0.14237  |
| 532 | gtf2ird1 | 13  | 0.155007 |
| 533 | gusb     | 104 | 0.152199 |
| 534 | gys2     | 12  | 0.121519 |
| 535 | habp2    | 12  | 0.129448 |
| 536 | hadh2    | 24  | 0.172009 |
| 537 | hccs     | 12  | 0.22371  |
| 538 | hdac1    | 130 | 0.12546  |
| 539 | hdac10   | 52  | 0.122669 |
| 540 | hdac11   | 143 | 0.139828 |
| 541 | hdac2    | 197 | 0.137917 |
| 542 | hdac3    | 104 | 0.127408 |
| 543 | hdac4    | 364 | 0.133799 |
| 544 | hdac5    | 195 | 0.126816 |
| 545 | hdac6    | 156 | 0.177597 |
| 546 | hdac7a   | 156 | 0.12872  |
| 547 | hdac8    | 156 | 0.195983 |
| 548 | hdac9    | 325 | 0.125853 |
| 549 | hectd1   | 12  | 0.112122 |
| 550 | hecw1    | 13  | 0.137425 |
| 551 | hells    | 228 | 0.144301 |
| 552 | herc2    | 12  | 0.131907 |
| 553 | herc3    | 13  | 0.120968 |
| 554 | herc5    | 13  | 0.12322  |
| 555 | herc6    | 25  | 0.137562 |
| 556 | hexa     | 120 | 0.123843 |
| 557 | hexb     | 130 | 0.139389 |
| 558 | hhex     | 13  | 0.123184 |
| 559 | hibch    | 13  | 0.151892 |
| 560 | hils1    | 39  | 0.121698 |
| 561 | hisppd1  | 26  | 0.151877 |
| 562 | hltf     | 26  | 0.108078 |
| 563 | hmcn1    | 52  | 0.126815 |

|     |          |     |          |
|-----|----------|-----|----------|
| 564 | hmga2    | 12  | 0.111324 |
| 565 | hmgcl    | 108 | 0.129276 |
| 566 | hmmr     | 39  | 0.137349 |
| 567 | hnrpc    | 84  | 0.161935 |
| 568 | hnrpd    | 13  | 0.167022 |
| 569 | hnrpd1   | 13  | 0.146396 |
| 570 | homer1   | 117 | 0.136902 |
| 571 | hook3    | 39  | 0.132692 |
| 572 | hpca     | 39  | 0.134215 |
| 573 | hpd      | 108 | 0.130068 |
| 574 | hpvt1    | 96  | 0.177089 |
| 575 | hras     | 36  | 0.127601 |
| 576 | hs3st2   | 26  | 0.130127 |
| 577 | hsd17b12 | 12  | 0.138796 |
| 578 | hsd17b4  | 13  | 0.138235 |
| 579 | hspa12a  | 12  | 0.112548 |
| 580 | hspd1    | 13  | 0.122254 |
| 581 | hsph1    | 12  | 0.12857  |
| 582 | htatip   | 72  | 0.128441 |
| 583 | ibtk     | 13  | 0.120994 |
| 584 | ica1l    | 13  | 0.1318   |
| 585 | ids      | 99  | 0.188397 |
| 586 | ifit2    | 13  | 0.118996 |
| 587 | ifng     | 12  | 0.118186 |
| 588 | ifrd1    | 13  | 0.153586 |
| 589 | ift81    | 12  | 0.161165 |
| 590 | ift88    | 31  | 0.13137  |
| 591 | igbp1    | 72  | 0.209317 |
| 592 | igf1     | 48  | 0.125401 |
| 593 | igfbp1   | 13  | 0.145648 |
| 594 | igfbpl1  | 12  | 0.152892 |
| 595 | il17ra   | 13  | 0.116093 |
| 596 | il1rap1  | 132 | 0.185946 |
| 597 | il1rap2  | 12  | 0.182618 |
| 598 | il32     | 13  | 0.136817 |
| 599 | imp5     | 13  | 0.130178 |
| 600 | ina      | 36  | 0.126141 |
| 601 | ing1     | 72  | 0.119942 |
| 602 | ing2     | 52  | 0.125607 |
| 603 | ing3     | 163 | 0.133482 |
| 604 | ing4     | 72  | 0.12259  |
| 605 | ing5     | 104 | 0.121633 |
| 606 | insr     | 273 | 0.132563 |
| 607 | iqgap2   | 13  | 0.140621 |
| 608 | irak1    | 12  | 0.126234 |
| 609 | irak3    | 12  | 0.112811 |
| 610 | islr     | 12  | 0.164781 |

|     |          |     |          |
|-----|----------|-----|----------|
| 611 | itga4    | 13  | 0.120519 |
| 612 | itga8    | 13  | 0.125352 |
| 613 | itgb8    | 13  | 0.136928 |
| 614 | itpr1    | 728 | 0.133306 |
| 615 | ivns1abp | 13  | 0.144993 |
| 616 | jag1     | 195 | 0.130973 |
| 617 | jarid2   | 234 | 0.137884 |
| 618 | jmjd1a   | 273 | 0.126714 |
| 619 | jmjd1b   | 312 | 0.125667 |
| 620 | jmjd1c   | 299 | 0.130924 |
| 621 | jmjd2a   | 273 | 0.129577 |
| 622 | jmjd2b   | 273 | 0.13499  |
| 623 | jmjd2c   | 312 | 0.127105 |
| 624 | jmjd2d   | 60  | 0.125219 |
| 625 | jmjd3    | 104 | 0.125821 |
| 626 | jmjd4    | 65  | 0.123511 |
| 627 | jmjd5    | 130 | 0.139617 |
| 628 | jmjd6    | 26  | 0.115464 |
| 629 | kalrn    | 754 | 0.131079 |
| 630 | katnal1  | 24  | 0.110442 |
| 631 | kcnc3    | 52  | 0.148188 |
| 632 | kcnip1   | 13  | 0.131246 |
| 633 | kcnj11   | 12  | 0.127478 |
| 634 | kcnq2    | 208 | 0.13969  |
| 635 | kdelr2   | 65  | 0.115895 |
| 636 | kdr      | 13  | 0.129854 |
| 637 | kiaa0495 | 13  | 0.161034 |
| 638 | kiaa0562 | 13  | 0.183945 |
| 639 | kiaa0564 | 24  | 0.14503  |
| 640 | kiaa0774 | 12  | 0.129925 |
| 641 | kiaa1267 | 156 | 0.140642 |
| 642 | kiaa1279 | 91  | 0.132133 |
| 643 | kiaa1529 | 12  | 0.136453 |
| 644 | kiaa1530 | 13  | 0.118735 |
| 645 | kiaa1598 | 12  | 0.118027 |
| 646 | kiaa1840 | 12  | 0.121826 |
| 647 | kiaa1914 | 12  | 0.125009 |
| 648 | kif17    | 180 | 0.136816 |
| 649 | kif1a    | 481 | 0.138094 |
| 650 | kif5c    | 39  | 0.125702 |
| 651 | klc2     | 84  | 0.130095 |
| 652 | klhl7    | 13  | 0.121658 |
| 653 | kras     | 72  | 0.137111 |
| 654 | l1cam    | 72  | 0.156692 |
| 655 | lama2    | 790 | 0.130721 |
| 656 | lamb4    | 13  | 0.158976 |
| 657 | lamp2    | 120 | 0.175956 |

|     |           |     |          |
|-----|-----------|-----|----------|
| 658 | large     | 208 | 0.133156 |
| 659 | lass3     | 13  | 0.148561 |
| 660 | lat2      | 13  | 0.140457 |
| 661 | lats1     | 13  | 0.134781 |
| 662 | lbr       | 156 | 0.121222 |
| 663 | lcp2      | 13  | 0.135483 |
| 664 | ldhd      | 13  | 0.140098 |
| 665 | ldoc1     | 12  | 0.181994 |
| 666 | letm1     | 13  | 0.120637 |
| 667 | lhx4      | 13  | 0.139799 |
| 668 | lig4      | 36  | 0.139325 |
| 669 | lin7a     | 72  | 0.124729 |
| 670 | lnx2      | 12  | 0.121445 |
| 671 | loc129285 | 13  | 0.126716 |
| 672 | loc137886 | 13  | 0.126763 |
| 673 | loc139060 | 12  | 0.161474 |
| 674 | loc152586 | 13  | 0.125184 |
| 675 | loc168850 | 13  | 0.120985 |
| 676 | loc205272 | 7   | 0.147306 |
| 677 | loc283537 | 12  | 0.111558 |
| 678 | loc285989 | 65  | 0.125878 |
| 679 | loc286411 | 60  | 0.191024 |
| 680 | loc339766 | 13  | 0.159524 |
| 681 | loc341230 | 12  | 0.121933 |
| 682 | loc341784 | 12  | 0.132136 |
| 683 | loc342346 | 13  | 0.142098 |
| 684 | loc346673 | 13  | 0.124133 |
| 685 | loc387882 | 12  | 0.17502  |
| 686 | loc389849 | 7   | 0.23042  |
| 687 | loc390110 | 12  | 0.127019 |
| 688 | loc391205 | 13  | 0.155735 |
| 689 | loc391343 | 13  | 0.159419 |
| 690 | loc391609 | 13  | 0.107861 |
| 691 | loc391738 | 13  | 0.141109 |
| 692 | loc392456 | 12  | 0.184929 |
| 693 | loc392516 | 12  | 0.152218 |
| 694 | loc392862 | 182 | 0.134495 |
| 695 | loc401744 | 12  | 0.122392 |
| 696 | loc401911 | 13  | 0.156798 |
| 697 | loc439950 | 13  | 0.126539 |
| 698 | loc440503 | 13  | 0.120766 |
| 699 | loc440995 | 13  | 0.122556 |
| 700 | loc441160 | 13  | 0.123513 |
| 701 | loc441282 | 13  | 0.120602 |
| 702 | loc441654 | 12  | 0.141968 |
| 703 | loc442367 | 13  | 0.175814 |
| 704 | loc442448 | 12  | 0.162818 |

|     |           |    |          |
|-----|-----------|----|----------|
| 705 | loc51334  | 13 | 0.128118 |
| 706 | loc641922 | 18 | 0.185223 |
| 707 | loc642837 | 13 | 0.127571 |
| 708 | loc642892 | 9  | 0.164836 |
| 709 | loc643052 | 6  | 0.22515  |
| 710 | loc643171 | 2  | 0.30397  |
| 711 | loc643309 | 12 | 0.126703 |
| 712 | loc643324 | 13 | 0.121723 |
| 713 | loc643342 | 12 | 0.126935 |
| 714 | loc643377 | 13 | 0.134489 |
| 715 | loc643382 | 24 | 0.116657 |
| 716 | loc643529 | 13 | 0.146947 |
| 717 | loc643665 | 13 | 0.121325 |
| 718 | loc643825 | 13 | 0.140645 |
| 719 | loc643983 | 13 | 0.121234 |
| 720 | loc644151 | 13 | 0.129512 |
| 721 | loc645053 | 13 | 0.131945 |
| 722 | loc645101 | 13 | 0.150648 |
| 723 | loc645686 | 1  | 0.284725 |
| 724 | loc645771 | 8  | 0.148191 |
| 725 | loc646357 | 12 | 0.146815 |
| 726 | loc646390 | 12 | 0.148773 |
| 727 | loc646486 | 13 | 0.128998 |
| 728 | loc646535 | 12 | 0.122591 |
| 729 | loc646755 | 12 | 0.127012 |
| 730 | loc646799 | 12 | 0.137743 |
| 731 | loc646871 | 12 | 0.129042 |
| 732 | loc646907 | 13 | 0.124943 |
| 733 | loc646929 | 24 | 0.14032  |
| 734 | loc646976 | 13 | 0.103775 |
| 735 | loc646982 | 12 | 0.121482 |
| 736 | loc647145 | 13 | 0.125315 |
| 737 | loc647299 | 13 | 0.13087  |
| 738 | loc649264 | 13 | 0.117656 |
| 739 | loc651746 | 13 | 0.123835 |
| 740 | loc727729 | 12 | 0.10685  |
| 741 | loc727795 | 11 | 0.176709 |
| 742 | loc727808 | 12 | 0.126791 |
| 743 | loc727900 | 13 | 0.133795 |
| 744 | loc728058 | 26 | 0.127773 |
| 745 | loc728126 | 37 | 0.155631 |
| 746 | loc728140 | 13 | 0.120139 |
| 747 | loc728148 | 36 | 0.128271 |
| 748 | loc728152 | 12 | 0.126276 |
| 749 | loc728176 | 13 | 0.122929 |
| 750 | loc728185 | 39 | 0.1247   |
| 751 | loc728186 | 13 | 0.141335 |



|     |           |     |          |
|-----|-----------|-----|----------|
| 752 | loc728194 | 247 | 0.143573 |
| 753 | loc728217 | 13  | 0.146271 |
| 754 | loc728256 | 26  | 0.133586 |
| 755 | loc728268 | 34  | 0.145357 |
| 756 | loc728342 | 13  | 0.162223 |
| 757 | loc728467 | 12  | 0.127041 |
| 758 | loc728545 | 3   | 0.160349 |
| 759 | loc728547 | 13  | 0.124845 |
| 760 | loc728591 | 12  | 0.162218 |
| 761 | loc728695 | 15  | 0.616879 |
| 762 | loc728703 | 13  | 0.133384 |
| 763 | loc728711 | 13  | 0.199266 |
| 764 | loc728716 | 13  | 0.134079 |
| 765 | loc728738 | 13  | 0.121849 |
| 766 | loc728762 | 13  | 0.114955 |
| 767 | loc729052 | 12  | 0.175081 |
| 768 | loc729290 | 13  | 0.107601 |
| 769 | loc729571 | 13  | 0.121098 |
| 770 | loc729578 | 13  | 0.126713 |
| 771 | loc729697 | 12  | 0.122459 |
| 772 | loc729729 | 13  | 0.139091 |
| 773 | loc729819 | 12  | 0.12862  |
| 774 | loc729834 | 1   | 0.175022 |
| 775 | loc729861 | 13  | 0.140656 |
| 776 | loc729894 | 12  | 0.1582   |
| 777 | loc730054 | 12  | 0.138034 |
| 778 | loc730100 | 39  | 0.138784 |
| 779 | loc730131 | 12  | 0.131983 |
| 780 | loc88523  | 12  | 0.123617 |
| 781 | loc90355  | 13  | 0.134344 |
| 782 | lpp       | 13  | 0.128593 |
| 783 | lrfn1     | 26  | 0.11951  |
| 784 | lrfn2     | 39  | 0.126243 |
| 785 | lrrc33    | 39  | 0.137857 |
| 786 | lrrc4     | 26  | 0.125503 |
| 787 | lrrc47    | 13  | 0.129254 |
| 788 | lrrfip1   | 13  | 0.135954 |
| 789 | lyn       | 156 | 0.133029 |
| 790 | lztr2     | 13  | 0.126853 |
| 791 | magel2    | 12  | 0.115874 |
| 792 | magi2     | 286 | 0.139543 |
| 793 | maml3     | 13  | 0.125961 |
| 794 | man2a1    | 13  | 0.12786  |
| 795 | maoa      | 156 | 0.18253  |
| 796 | maob      | 24  | 0.157233 |
| 797 | map1a     | 60  | 0.123782 |
| 798 | map1b     | 91  | 0.129731 |

|     |          |     |          |
|-----|----------|-----|----------|
| 799 | map2     | 221 | 0.133401 |
| 800 | map2k1   | 120 | 0.128039 |
| 801 | map2k2   | 130 | 0.130148 |
| 802 | mapk1    | 104 | 0.132079 |
| 803 | mapk10   | 187 | 0.135795 |
| 804 | mapk3    | 52  | 0.138308 |
| 805 | mapk8ip2 | 104 | 0.138959 |
| 806 | mapt     | 13  | 0.150632 |
| 807 | marcks   | 26  | 0.118046 |
| 808 | masp1    | 13  | 0.135938 |
| 809 | mbd1     | 104 | 0.123393 |
| 810 | mbd2     | 126 | 0.135343 |
| 811 | mbd3     | 91  | 0.125744 |
| 812 | mbd3l1   | 39  | 0.118884 |
| 813 | mbd3l2   | 26  | 0.116047 |
| 814 | mbd4     | 117 | 0.137379 |
| 815 | mbd5     | 156 | 0.123069 |
| 816 | mbd6     | 84  | 0.129402 |
| 817 | mcph1    | 156 | 0.129899 |
| 818 | me1      | 13  | 0.126343 |
| 819 | mecp2    | 96  | 0.159156 |
| 820 | med12    | 132 | 0.195093 |
| 821 | mfhas1   | 13  | 0.109753 |
| 822 | mgat2    | 12  | 0.123962 |
| 823 | mgc12966 | 26  | 0.138022 |
| 824 | mgc33212 | 51  | 0.150704 |
| 825 | mgc39715 | 13  | 0.11794  |
| 826 | mgc4618  | 13  | 0.126287 |
| 827 | mgc5242  | 13  | 0.134141 |
| 828 | mid1     | 132 | 0.194581 |
| 829 | mid2     | 12  | 0.167192 |
| 830 | mipep    | 9   | 0.170782 |
| 831 | mizf     | 108 | 0.131003 |
| 832 | mkks     | 91  | 0.125225 |
| 833 | mkrn2    | 104 | 0.133296 |
| 834 | mlc1     | 13  | 0.136218 |
| 835 | mlh1     | 247 | 0.130641 |
| 836 | mlph     | 13  | 0.148485 |
| 837 | mms19l   | 12  | 0.124089 |
| 838 | mocs2    | 91  | 0.134272 |
| 839 | mog      | 86  | 0.118628 |
| 840 | mphosph1 | 26  | 0.166157 |
| 841 | mpp2     | 91  | 0.129884 |
| 842 | mpp3     | 169 | 0.12933  |
| 843 | mr1      | 13  | 0.129605 |
| 844 | mrlc2    | 49  | 0.13945  |
| 845 | mrps24   | 13  | 0.120508 |

|     |         |     |          |
|-----|---------|-----|----------|
| 846 | mrps31  | 9   | 0.189528 |
| 847 | msx1    | 13  | 0.137078 |
| 848 | mthfd1l | 13  | 0.148005 |
| 849 | mthfr   | 109 | 0.134744 |
| 850 | mtmr2   | 24  | 0.137481 |
| 851 | mtmr6   | 12  | 0.148454 |
| 852 | mtnr1a  | 13  | 0.120288 |
| 853 | mtr     | 416 | 0.130973 |
| 854 | mtrf1   | 12  | 0.110273 |
| 855 | mtrr    | 182 | 0.12791  |
| 856 | mxi1    | 12  | 0.130927 |
| 857 | mybpc1  | 24  | 0.120431 |
| 858 | mycn    | 39  | 0.117513 |
| 859 | myh10   | 442 | 0.131887 |
| 860 | myo1b   | 13  | 0.128744 |
| 861 | myo1g   | 13  | 0.149129 |
| 862 | myo3a   | 13  | 0.14741  |
| 863 | myo5a   | 468 | 0.128807 |
| 864 | myo6    | 9   | 0.169335 |
| 865 | myo7a   | 504 | 0.139633 |
| 866 | myo7b   | 13  | 0.154868 |
| 867 | myst1   | 91  | 0.132774 |
| 868 | myst2   | 208 | 0.128468 |
| 869 | myst3   | 244 | 0.133967 |
| 870 | myst4   | 247 | 0.126469 |
| 871 | myt1l   | 299 | 0.131783 |
| 872 | nag8    | 13  | 0.124441 |
| 873 | naga    | 104 | 0.139005 |
| 874 | nans    | 12  | 0.147166 |
| 875 | nap1l5  | 13  | 0.138006 |
| 876 | nbea    | 48  | 0.138963 |
| 877 | nbeal1  | 13  | 0.129106 |
| 878 | ncam1   | 180 | 0.129525 |
| 879 | ncbp2   | 52  | 0.128965 |
| 880 | ncln    | 13  | 0.184528 |
| 881 | ndn     | 12  | 0.11263  |
| 882 | ndp     | 36  | 0.200259 |
| 883 | ndrg2   | 12  | 0.127558 |
| 884 | nef3    | 39  | 0.136312 |
| 885 | nelf    | 12  | 0.111453 |
| 886 | nell2   | 12  | 0.159011 |
| 887 | neto1   | 130 | 0.132742 |
| 888 | neto2   | 104 | 0.138453 |
| 889 | nf1     | 486 | 0.14699  |
| 890 | nhlrc2  | 12  | 0.145279 |
| 891 | nhs     | 96  | 0.16535  |
| 892 | nipbl   | 496 | 0.144526 |

|     |          |     |          |
|-----|----------|-----|----------|
| 893 | nkiras1  | 13  | 0.120207 |
| 894 | nlgn1    | 91  | 0.124188 |
| 895 | nlgn4x   | 84  | 0.195519 |
| 896 | nmt2     | 8   | 0.142083 |
| 897 | noc3l    | 13  | 0.135079 |
| 898 | nos1     | 348 | 0.132396 |
| 899 | nova2    | 52  | 0.131443 |
| 900 | npc1l1   | 13  | 0.128529 |
| 901 | npc2     | 60  | 0.120459 |
| 902 | npm1     | 13  | 0.135047 |
| 903 | nptx1    | 65  | 0.137324 |
| 904 | nptx2    | 65  | 0.129881 |
| 905 | nr2f2    | 13  | 0.154292 |
| 906 | nrp      | 12  | 0.144846 |
| 907 | nrcam    | 39  | 0.133537 |
| 908 | nrg1     | 208 | 0.132583 |
| 909 | nrgn     | 36  | 0.133641 |
| 910 | nrk      | 12  | 0.141936 |
| 911 | nrxn1    | 273 | 0.130542 |
| 912 | nsd1     | 325 | 0.127845 |
| 913 | nsf      | 104 | 0.133412 |
| 914 | nsmaf    | 13  | 0.120882 |
| 915 | nsun2    | 13  | 0.126851 |
| 916 | nt5dc3   | 12  | 0.130109 |
| 917 | ntng1    | 78  | 0.126471 |
| 918 | ntrk2    | 252 | 0.127258 |
| 919 | nubpl    | 12  | 0.130341 |
| 920 | nudt12   | 13  | 0.134126 |
| 921 | nup205   | 26  | 0.134213 |
| 922 | nup37    | 12  | 0.126245 |
| 923 | nupl1    | 36  | 0.132676 |
| 924 | obfc2a   | 13  | 0.147913 |
| 925 | oca2     | 12  | 0.1311   |
| 926 | ocrl     | 228 | 0.179748 |
| 927 | ofd1     | 225 | 0.167999 |
| 928 | ogdh     | 13  | 0.17428  |
| 929 | ogfrl1   | 13  | 0.142109 |
| 930 | olah     | 13  | 0.125566 |
| 931 | ophn1    | 276 | 0.19315  |
| 932 | orc4l    | 39  | 0.122761 |
| 933 | ostalpa  | 104 | 0.136947 |
| 934 | otx2     | 48  | 0.137834 |
| 935 | p2rxl1   | 13  | 0.14465  |
| 936 | pacsin1  | 91  | 0.144545 |
| 937 | pafah1b1 | 143 | 0.132602 |
| 938 | pah      | 156 | 0.13065  |
| 939 | pak2     | 181 | 0.137399 |

|     |         |     |          |
|-----|---------|-----|----------|
| 940 | pak3    | 192 | 0.183201 |
| 941 | pam     | 65  | 0.14086  |
| 942 | pan3    | 12  | 0.141281 |
| 943 | pank1   | 13  | 0.126508 |
| 944 | parp4   | 16  | 0.169729 |
| 945 | pax4    | 13  | 0.146763 |
| 946 | pcaf    | 234 | 0.124998 |
| 947 | pcca    | 268 | 0.129788 |
| 948 | pccb    | 169 | 0.131102 |
| 949 | pcgf5   | 13  | 0.141587 |
| 950 | pclkc   | 13  | 0.137127 |
| 951 | pcna    | 91  | 0.131106 |
| 952 | pcyt1a  | 117 | 0.125759 |
| 953 | pdap1   | 78  | 0.139883 |
| 954 | pdcc    | 13  | 0.128749 |
| 955 | pdcd4   | 12  | 0.133978 |
| 956 | pde3a   | 12  | 0.112303 |
| 957 | pde8b   | 39  | 0.126175 |
| 958 | pde9a   | 13  | 0.143425 |
| 959 | pdgfd   | 12  | 0.135245 |
| 960 | pdgfra  | 13  | 0.13267  |
| 961 | pdha1   | 120 | 0.195666 |
| 962 | pdhx    | 127 | 0.139383 |
| 963 | pepd    | 195 | 0.138219 |
| 964 | per2    | 26  | 0.134167 |
| 965 | pex10   | 61  | 0.136693 |
| 966 | pex16   | 12  | 0.142293 |
| 967 | pex5    | 84  | 0.128182 |
| 968 | pex5l   | 195 | 0.13852  |
| 969 | pex7    | 113 | 0.131829 |
| 970 | pgk1    | 96  | 0.194121 |
| 971 | phactr3 | 13  | 0.149497 |
| 972 | phf16   | 132 | 0.18843  |
| 973 | phf21a  | 240 | 0.130845 |
| 974 | phf6    | 84  | 0.160689 |
| 975 | phf8    | 240 | 0.187423 |
| 976 | phlpp1  | 13  | 0.134449 |
| 977 | pick1   | 130 | 0.131389 |
| 978 | pigx    | 65  | 0.125416 |
| 979 | pigz    | 39  | 0.129542 |
| 980 | pik3c3  | 13  | 0.113369 |
| 981 | pik3ca  | 185 | 0.137313 |
| 982 | pik4ca  | 13  | 0.128277 |
| 983 | pitpna  | 13  | 0.119578 |
| 984 | pja2    | 13  | 0.119898 |
| 985 | pkd1l1  | 26  | 0.143124 |
| 986 | pla2g4a | 13  | 0.160023 |

|      |         |     |          |
|------|---------|-----|----------|
| 987  | plat    | 143 | 0.121115 |
| 988  | plcb1   | 416 | 0.137571 |
| 989  | plce1   | 13  | 0.121837 |
| 990  | plcg1   | 130 | 0.128242 |
| 991  | plekha5 | 12  | 0.125334 |
| 992  | plp1    | 72  | 0.189227 |
| 993  | pmm2    | 91  | 0.133636 |
| 994  | pnlip   | 12  | 0.117267 |
| 995  | pnpo    | 65  | 0.124706 |
| 996  | polr1e  | 12  | 0.119935 |
| 997  | polr3f  | 13  | 0.141363 |
| 998  | pols    | 26  | 0.124275 |
| 999  | pomt1   | 180 | 0.137076 |
| 1000 | porcn   | 12  | 0.214655 |
| 1001 | postn   | 24  | 0.141774 |
| 1002 | pote8   | 44  | 0.157971 |
| 1003 | pou1f1  | 72  | 0.132129 |
| 1004 | pou6f2  | 13  | 0.143281 |
| 1005 | ppcdc   | 12  | 0.140785 |
| 1006 | ppfia1  | 267 | 0.124887 |
| 1007 | ppfia2  | 384 | 0.130632 |
| 1008 | ppfia3  | 169 | 0.125229 |
| 1009 | ppfia4  | 156 | 0.133804 |
| 1010 | ppgb    | 65  | 0.128892 |
| 1011 | ppil2   | 13  | 0.14246  |
| 1012 | ppm1k   | 13  | 0.10221  |
| 1013 | ppox    | 39  | 0.126104 |
| 1014 | ppp1cc  | 72  | 0.130239 |
| 1015 | ppp1r1b | 52  | 0.133368 |
| 1016 | ppp1r3b | 13  | 0.116049 |
| 1017 | ppp1r9a | 195 | 0.133199 |
| 1018 | ppp1r9b | 104 | 0.135525 |
| 1019 | ppp2ca  | 91  | 0.139507 |
| 1020 | ppp2r1a | 130 | 0.126484 |
| 1021 | ppp2r5c | 24  | 0.127734 |
| 1022 | ppp3ca  | 179 | 0.134849 |
| 1023 | ppp3r1  | 78  | 0.140174 |
| 1024 | pqbp1   | 36  | 0.197889 |
| 1025 | pqwd    | 13  | 0.151793 |
| 1026 | prdm6   | 13  | 0.124765 |
| 1027 | prei3   | 13  | 0.157436 |
| 1028 | prkacb  | 136 | 0.137288 |
| 1029 | prkar2b | 130 | 0.132613 |
| 1030 | prkca   | 221 | 0.133971 |
| 1031 | prkcb1  | 221 | 0.12745  |
| 1032 | prkce   | 195 | 0.131296 |
| 1033 | prpf8   | 13  | 0.138513 |

|      |          |     |          |
|------|----------|-----|----------|
| 1034 | prps1    | 83  | 0.176393 |
| 1035 | prss12   | 169 | 0.129776 |
| 1036 | prss21   | 13  | 0.144343 |
| 1037 | pscd3    | 117 | 0.126197 |
| 1038 | pskh2    | 13  | 0.124551 |
| 1039 | ptbp1    | 13  | 0.138406 |
| 1040 | ptcd1    | 91  | 0.136667 |
| 1041 | ptch     | 252 | 0.134331 |
| 1042 | ptdsr    | 91  | 0.131939 |
| 1043 | pten     | 106 | 0.147569 |
| 1044 | ptk2b    | 311 | 0.137446 |
| 1045 | ptpn11   | 177 | 0.131329 |
| 1046 | ptpn13   | 13  | 0.153613 |
| 1047 | ptpn5    | 144 | 0.138259 |
| 1048 | ptprd    | 468 | 0.136422 |
| 1049 | pts      | 48  | 0.129898 |
| 1050 | pvr1     | 96  | 0.13713  |
| 1051 | pxmp3    | 45  | 0.130205 |
| 1052 | qdpr     | 91  | 0.138628 |
| 1053 | rab2     | 86  | 0.144959 |
| 1054 | rab2b    | 84  | 0.143044 |
| 1055 | rab3a    | 65  | 0.128869 |
| 1056 | rab3gap1 | 234 | 0.130428 |
| 1057 | rab3gap2 | 330 | 0.13222  |
| 1058 | rab6a    | 96  | 0.130087 |
| 1059 | rabl2b   | 91  | 0.132639 |
| 1060 | rac1     | 104 | 0.130239 |
| 1061 | raet1e   | 13  | 0.140555 |
| 1062 | rai1     | 78  | 0.13198  |
| 1063 | rala     | 65  | 0.136033 |
| 1064 | ranbp3   | 13  | 0.13243  |
| 1065 | rap2a    | 24  | 0.142721 |
| 1066 | rapgef5  | 26  | 0.145713 |
| 1067 | raph1    | 13  | 0.162897 |
| 1068 | rasa1    | 39  | 0.134279 |
| 1069 | rasal2   | 26  | 0.125491 |
| 1070 | rasgef1b | 13  | 0.145009 |
| 1071 | rasgrf1  | 348 | 0.132471 |
| 1072 | rbm20    | 12  | 0.110814 |
| 1073 | rbm41    | 12  | 0.152636 |
| 1074 | rcc1     | 143 | 0.125864 |
| 1075 | reln     | 26  | 0.124569 |
| 1076 | rfc3     | 24  | 0.131842 |
| 1077 | rfx4     | 12  | 0.121401 |
| 1078 | rgc32    | 12  | 0.146187 |
| 1079 | rgs12    | 13  | 0.122291 |
| 1080 | rgs22    | 26  | 0.145348 |

|      |         |     |           |
|------|---------|-----|-----------|
| 1081 | rhag    | 13  | 0.14949   |
| 1082 | ric8b   | 12  | 0.148902  |
| 1083 | rics    | 132 | 0.124199  |
| 1084 | rims2   | 13  | 0.162257  |
| 1085 | rit2    | 65  | 0.136591  |
| 1086 | rmrpr   | 13  | 0.124121  |
| 1087 | rnase1  | 12  | 0.127033  |
| 1088 | rnf168  | 74  | 0.130851  |
| 1089 | rnf17   | 24  | 0.128992  |
| 1090 | rnf170  | 13  | 0.167721  |
| 1091 | rnf19   | 13  | 0.145413  |
| 1092 | rnf6    | 12  | 0.126988  |
| 1093 | rnpepl1 | 13  | 0.134299  |
| 1094 | ropn1l  | 13  | 0.131737  |
| 1095 | rp2     | 12  | 0.191334  |
| 1096 | rph3al  | 13  | 0.151854  |
| 1097 | rpl15   | 13  | 0.135325  |
| 1098 | rpl21   | 12  | 0.136594  |
| 1099 | rpp30   | 13  | 0.133124  |
| 1100 | rps6ka1 | 168 | 0.127859  |
| 1101 | rps6ka2 | 325 | 0.130458  |
| 1102 | rps6ka3 | 251 | 0.173849  |
| 1103 | rps6ka4 | 108 | 0.127478  |
| 1104 | rps6ka5 | 214 | 0.133811  |
| 1105 | rps6ka6 | 220 | 0.172352  |
| 1106 | rtbdn   | 13  | 0.129479  |
| 1107 | rtdr1   | 13  | 0.141944  |
| 1108 | rxfp2   | 12  | 0.126552  |
| 1109 | sacs    | 12  | 0.0942808 |
| 1110 | sall1   | 78  | 0.126193  |
| 1111 | sap18   | 60  | 0.120149  |
| 1112 | sap30   | 53  | 0.143912  |
| 1113 | sap30l  | 78  | 0.124266  |
| 1114 | sash1   | 13  | 0.139941  |
| 1115 | satb2   | 13  | 0.138417  |
| 1116 | sbf1    | 130 | 0.131954  |
| 1117 | sbf2    | 492 | 0.131126  |
| 1118 | sc5dl   | 60  | 0.137912  |
| 1119 | scn2a2  | 13  | 0.113511  |
| 1120 | scn8a   | 324 | 0.133648  |
| 1121 | sdcbp   | 117 | 0.137404  |
| 1122 | sdk1    | 585 | 0.133253  |
| 1123 | sec3111 | 26  | 0.130149  |
| 1124 | sec61a2 | 13  | 0.138102  |
| 1125 | sema5a  | 13  | 0.137747  |
| 1126 | sema6a  | 13  | 0.139201  |
| 1127 | sema7a  | 12  | 0.154561  |



|      |          |     |          |
|------|----------|-----|----------|
| 1128 | senp5    | 104 | 0.126696 |
| 1129 | set      | 96  | 0.139342 |
| 1130 | setbp1   | 91  | 0.115139 |
| 1131 | setd1a   | 195 | 0.12944  |
| 1132 | setd2    | 273 | 0.138162 |
| 1133 | setd3    | 192 | 0.131553 |
| 1134 | setd4    | 182 | 0.128598 |
| 1135 | setd5    | 299 | 0.130199 |
| 1136 | setd6    | 52  | 0.111235 |
| 1137 | setd7    | 130 | 0.117779 |
| 1138 | setd8    | 120 | 0.129783 |
| 1139 | setdb1   | 221 | 0.125679 |
| 1140 | setdb2   | 190 | 0.138929 |
| 1141 | sfrs14   | 13  | 0.121453 |
| 1142 | sgcg     | 12  | 0.136211 |
| 1143 | sgsh     | 65  | 0.1341   |
| 1144 | shank1   | 182 | 0.134471 |
| 1145 | shank2   | 108 | 0.132961 |
| 1146 | shank3   | 195 | 0.131094 |
| 1147 | shh      | 39  | 0.133451 |
| 1148 | shroom4  | 110 | 0.1735   |
| 1149 | sin3a    | 253 | 0.125095 |
| 1150 | sin3b    | 247 | 0.138146 |
| 1151 | six3     | 26  | 0.118025 |
| 1152 | slc13a4  | 13  | 0.139434 |
| 1153 | slc16a12 | 13  | 0.104503 |
| 1154 | slc16a2  | 72  | 0.195273 |
| 1155 | slc17a5  | 131 | 0.13426  |
| 1156 | slc17a8  | 12  | 0.126167 |
| 1157 | slc1a1   | 156 | 0.13853  |
| 1158 | slc1a2   | 132 | 0.128782 |
| 1159 | slc26a3  | 13  | 0.154886 |
| 1160 | slc26a4  | 13  | 0.120293 |
| 1161 | slc26a5  | 13  | 0.171832 |
| 1162 | slc2a1   | 78  | 0.137382 |
| 1163 | slc2a2   | 143 | 0.128292 |
| 1164 | slc35c1  | 24  | 0.124617 |
| 1165 | slc35d2  | 12  | 0.120382 |
| 1166 | slc41a2  | 12  | 0.116012 |
| 1167 | slc4a10  | 338 | 0.137854 |
| 1168 | slc4a4   | 299 | 0.134447 |
| 1169 | slc4a7   | 13  | 0.158676 |
| 1170 | slc5a5   | 130 | 0.122639 |
| 1171 | slc5a8   | 12  | 0.134673 |
| 1172 | slc6a19  | 13  | 0.12374  |
| 1173 | slc6a8   | 64  | 0.166563 |
| 1174 | slc7a13  | 13  | 0.161066 |

|      |          |     |          |
|------|----------|-----|----------|
| 1175 | slc9a3r2 | 39  | 0.127982 |
| 1176 | slc9a7   | 180 | 0.185907 |
| 1177 | slco1c1  | 12  | 0.117131 |
| 1178 | slco4c1  | 13  | 0.132591 |
| 1179 | slit3    | 13  | 0.129737 |
| 1180 | smarca1  | 271 | 0.174047 |
| 1181 | smarca2  | 442 | 0.12965  |
| 1182 | smarca3  | 271 | 0.142183 |
| 1183 | smarca4  | 390 | 0.134459 |
| 1184 | smarca5  | 278 | 0.149268 |
| 1185 | smarcad1 | 271 | 0.140739 |
| 1186 | smarcal1 | 247 | 0.126361 |
| 1187 | smarcb1  | 143 | 0.138033 |
| 1188 | smarcc1  | 379 | 0.137815 |
| 1189 | smarcc2  | 216 | 0.118059 |
| 1190 | smarcd1  | 144 | 0.120937 |
| 1191 | smarcd2  | 78  | 0.124233 |
| 1192 | smarcd3  | 117 | 0.136996 |
| 1193 | smarce1  | 142 | 0.137717 |
| 1194 | smc1a    | 156 | 0.194002 |
| 1195 | smc3     | 180 | 0.127825 |
| 1196 | smcx     | 204 | 0.201982 |
| 1197 | smg7     | 13  | 0.131821 |
| 1198 | sms      | 120 | 0.183281 |
| 1199 | smurf1   | 221 | 0.129934 |
| 1200 | smurf2   | 6   | 0.187156 |
| 1201 | smxc     | 24  | 0.142039 |
| 1202 | snap25   | 104 | 0.13388  |
| 1203 | snap91   | 26  | 0.149502 |
| 1204 | sncaip   | 26  | 0.122666 |
| 1205 | snrpn    | 12  | 0.138202 |
| 1206 | sntg2    | 143 | 0.129501 |
| 1207 | snx13    | 13  | 0.140406 |
| 1208 | snx16    | 26  | 0.148249 |
| 1209 | soat1    | 13  | 0.192029 |
| 1210 | sorbs1   | 52  | 0.125863 |
| 1211 | sort1    | 13  | 0.118063 |
| 1212 | sox10    | 52  | 0.133698 |
| 1213 | sox2     | 13  | 0.107085 |
| 1214 | sox3     | 12  | 0.141564 |
| 1215 | sox7     | 13  | 0.142349 |
| 1216 | sox8     | 39  | 0.124786 |
| 1217 | spag1    | 13  | 0.131765 |
| 1218 | specc1   | 13  | 0.132566 |
| 1219 | spg20    | 96  | 0.128477 |
| 1220 | sptbn1   | 442 | 0.1329   |
| 1221 | src      | 169 | 0.133546 |

|      |         |      |          |
|------|---------|------|----------|
| 1222 | srfbp1  | 13   | 0.161738 |
| 1223 | srpx2   | 104  | 0.183892 |
| 1224 | ssr4    | 12   | 0.136338 |
| 1225 | ssrp1   | 96   | 0.116985 |
| 1226 | st6gal1 | 13   | 0.125474 |
| 1227 | stab2   | 12   | 0.132041 |
| 1228 | stard13 | 36   | 0.128913 |
| 1229 | stat1   | 26   | 0.151428 |
| 1230 | stat4   | 13   | 0.137795 |
| 1231 | stau1   | 182  | 0.130098 |
| 1232 | stau2   | 137  | 0.144945 |
| 1233 | sth     | 13   | 0.117476 |
| 1234 | stk10   | 13   | 0.129582 |
| 1235 | stk17a  | 13   | 0.138944 |
| 1236 | stx1a   | 91   | 0.136918 |
| 1237 | stxbp1  | 240  | 0.128349 |
| 1238 | sunc1   | 13   | 0.199226 |
| 1239 | supt16h | 216  | 0.137722 |
| 1240 | supt3h  | 195  | 0.136684 |
| 1241 | supt4h1 | 78   | 0.126374 |
| 1242 | supt5h  | 156  | 0.130911 |
| 1243 | supt6h  | 299  | 0.128264 |
| 1244 | supt7l  | 104  | 0.12039  |
| 1245 | susd4   | 13   | 0.135141 |
| 1246 | suz12   | 179  | 0.154557 |
| 1247 | sycp2   | 13   | 0.13776  |
| 1248 | syn2    | 169  | 0.129998 |
| 1249 | syne1   | 1689 | 0.130077 |
| 1250 | syngap1 | 169  | 0.135217 |
| 1251 | syngr1  | 78   | 0.133232 |
| 1252 | synj1   | 390  | 0.135321 |
| 1253 | synpo   | 39   | 0.124079 |
| 1254 | syt1    | 96   | 0.122414 |
| 1255 | syt14   | 104  | 0.141585 |
| 1256 | syt4    | 52   | 0.114844 |
| 1257 | tat     | 104  | 0.121984 |
| 1258 | tbc1d3i | 8    | 0.159089 |
| 1259 | tbce    | 195  | 0.1383   |
| 1260 | tbl1x   | 194  | 0.171411 |
| 1261 | tbl1xr1 | 188  | 0.139488 |
| 1262 | tbx1    | 117  | 0.136864 |
| 1263 | tcn2    | 104  | 0.151423 |
| 1264 | tdg     | 12   | 0.115036 |
| 1265 | tdrd1   | 12   | 0.134816 |
| 1266 | tdrd7   | 12   | 0.134129 |
| 1267 | tfpi    | 13   | 0.125352 |
| 1268 | tgfbr1  | 108  | 0.132128 |

|      |          |     |          |
|------|----------|-----|----------|
| 1269 | tgfbr2   | 104 | 0.125604 |
| 1270 | tgif     | 104 | 0.133586 |
| 1271 | thnsl1   | 13  | 0.159697 |
| 1272 | thrb     | 130 | 0.12866  |
| 1273 | tiam1    | 351 | 0.133451 |
| 1274 | timm8a   | 24  | 0.180335 |
| 1275 | tjp1     | 276 | 0.127188 |
| 1276 | tln1     | 13  | 0.126142 |
| 1277 | tlr5     | 13  | 0.101595 |
| 1278 | tm2d3    | 13  | 0.110696 |
| 1279 | tm4sf19  | 52  | 0.125705 |
| 1280 | tmem130  | 104 | 0.130048 |
| 1281 | tmem165  | 13  | 0.121754 |
| 1282 | tmem67   | 263 | 0.15006  |
| 1283 | tmem76   | 26  | 0.126519 |
| 1284 | tmod2    | 120 | 0.129196 |
| 1285 | tnfrsf14 | 13  | 0.133467 |
| 1286 | tnks2    | 13  | 0.128437 |
| 1287 | tnr      | 273 | 0.131143 |
| 1288 | tns3     | 13  | 0.126414 |
| 1289 | tp53     | 104 | 0.121845 |
| 1290 | tpi1     | 24  | 0.127424 |
| 1291 | tpo      | 26  | 0.130016 |
| 1292 | tpr      | 26  | 0.163935 |
| 1293 | tpte2    | 12  | 0.218124 |
| 1294 | traf3ip1 | 13  | 0.115084 |
| 1295 | traf3ip3 | 156 | 0.131192 |
| 1296 | trak2    | 13  | 0.118629 |
| 1297 | trh      | 39  | 0.126015 |
| 1298 | trim36   | 13  | 0.139552 |
| 1299 | trpc6    | 24  | 0.119004 |
| 1300 | trpm5    | 12  | 0.138234 |
| 1301 | trrap    | 806 | 0.129006 |
| 1302 | tsc1     | 215 | 0.127951 |
| 1303 | tsc2     | 338 | 0.127858 |
| 1304 | tsen2    | 156 | 0.128355 |
| 1305 | tshr     | 120 | 0.134806 |
| 1306 | tslp     | 13  | 0.127549 |
| 1307 | tspan18  | 12  | 0.105541 |
| 1308 | tspan7   | 96  | 0.196372 |
| 1309 | ttc17    | 12  | 0.132104 |
| 1310 | ttc5     | 12  | 0.113525 |
| 1311 | ttk      | 10  | 0.188106 |
| 1312 | twist1   | 26  | 0.146589 |
| 1313 | twistnb  | 13  | 0.132706 |
| 1314 | ube1     | 12  | 0.2335   |
| 1315 | ube2a    | 48  | 0.163505 |

|      |         |     |          |
|------|---------|-----|----------|
| 1316 | ube2e1  | 13  | 0.14471  |
| 1317 | ube2e3  | 10  | 0.15722  |
| 1318 | ube3a   | 130 | 0.135812 |
| 1319 | ube3b   | 12  | 0.131825 |
| 1320 | ubr1    | 516 | 0.135503 |
| 1321 | ubxd7   | 156 | 0.141607 |
| 1322 | ufd1l   | 13  | 0.130006 |
| 1323 | ugcgl1  | 26  | 0.15217  |
| 1324 | ulk2    | 13  | 0.135041 |
| 1325 | unc13a  | 13  | 0.142435 |
| 1326 | unc13b  | 13  | 0.133712 |
| 1327 | unc5a   | 13  | 0.131    |
| 1328 | upb1    | 130 | 0.136136 |
| 1329 | upf2    | 13  | 0.17018  |
| 1330 | upp1    | 13  | 0.124797 |
| 1331 | usp11   | 12  | 0.169959 |
| 1332 | usp12   | 12  | 0.117285 |
| 1333 | usp42   | 208 | 0.126627 |
| 1334 | usp6nl  | 13  | 0.134526 |
| 1335 | ust     | 13  | 0.125151 |
| 1336 | utp20   | 12  | 0.134998 |
| 1337 | utx     | 12  | 0.185939 |
| 1338 | vamp2   | 52  | 0.142425 |
| 1339 | vcp     | 13  | 0.140377 |
| 1340 | vcx3a   | 16  | 0.492446 |
| 1341 | vdac1   | 104 | 0.129885 |
| 1342 | vegf    | 91  | 0.136727 |
| 1343 | vim     | 13  | 0.123316 |
| 1344 | vps13b  | 717 | 0.135293 |
| 1345 | vps41   | 13  | 0.1357   |
| 1346 | wasf1   | 143 | 0.137238 |
| 1347 | wasf3   | 12  | 0.156932 |
| 1348 | wdfy3   | 13  | 0.131558 |
| 1349 | wdr20   | 12  | 0.122481 |
| 1350 | wdr33   | 13  | 0.170357 |
| 1351 | wdr36   | 26  | 0.123906 |
| 1352 | wdr40b  | 12  | 0.145904 |
| 1353 | wdr53   | 26  | 0.134493 |
| 1354 | wdr59   | 13  | 0.124053 |
| 1355 | wdr76   | 12  | 0.145496 |
| 1356 | whdc1l2 | 8   | 0.158175 |
| 1357 | wif1    | 12  | 0.129911 |
| 1358 | wwc1    | 13  | 0.142441 |
| 1359 | wwc3    | 12  | 0.158078 |
| 1360 | xpa     | 7   | 0.159946 |
| 1361 | xpnpep1 | 12  | 0.101364 |
| 1362 | xpo4    | 12  | 0.131321 |

|      |         |     |          |
|------|---------|-----|----------|
| 1363 | xpr1    | 13  | 0.141846 |
| 1364 | xrcc4   | 26  | 0.141498 |
| 1365 | ysk4    | 13  | 0.111803 |
| 1366 | ywhae   | 75  | 0.144985 |
| 1367 | ywhah   | 26  | 0.127033 |
| 1368 | ywhaz   | 78  | 0.140532 |
| 1369 | zcchc7  | 12  | 0.135795 |
| 1370 | zcwpw1  | 13  | 0.106783 |
| 1371 | zdhhc19 | 91  | 0.148998 |
| 1372 | zdhhc20 | 12  | 0.123948 |
| 1373 | zdhhc4  | 91  | 0.123213 |
| 1374 | zfand1  | 13  | 0.118469 |
| 1375 | zfhx1b  | 130 | 0.124759 |
| 1376 | zfp42   | 13  | 0.152506 |
| 1377 | zfp95   | 65  | 0.125491 |
| 1378 | zfyve27 | 12  | 0.123427 |
| 1379 | zic1    | 39  | 0.119225 |
| 1380 | zic4    | 65  | 0.127065 |
| 1381 | zic5    | 24  | 0.131968 |
| 1382 | zmym2   | 48  | 0.124912 |
| 1383 | znf12   | 52  | 0.119414 |
| 1384 | znf200  | 13  | 0.109957 |
| 1385 | znf219  | 60  | 0.122579 |
| 1386 | znf394  | 39  | 0.122962 |
| 1387 | znf41   | 48  | 0.161088 |
| 1388 | znf498  | 91  | 0.129103 |
| 1389 | znf559  | 13  | 0.125684 |
| 1390 | znf655  | 78  | 0.121622 |
| 1391 | znf673  | 60  | 0.19942  |
| 1392 | znf674  | 60  | 0.171378 |
| 1393 | znf721  | 13  | 0.12938  |
| 1394 | znf81   | 76  | 0.186955 |
| 1395 | zranb3  | 13  | 0.123358 |
| 1396 | zrf1    | 13  | 0.15946  |
| 1397 | zswim2  | 13  | 0.157171 |
