# Supplementary material
Source: PubMed Central journal article supplement (PMC4023222)
Supplement: ejhg2013248x3.pdf [file ejhg2013248x3.pdf]

| Gene Name           | Forward primer |    |     |                           |        |    |     |
|---------------------|----------------|----|-----|---------------------------|--------|----|-----|
|                     | Length         | Tm | %GC | Sequence                  | Length | Tm | %GC |
| <i>ARID1B</i>       | 20             | 59 | 50  | GATCAACATGGCGACAACA       | 20     | 60 | 55  |
| <i>ARID2</i>        | 20             | 59 | 55  | CGACAGAGGGACTTGCATT       | 21     | 59 | 52  |
| <i>ARID4B</i>       | 21             | 58 | 48  | AACCCAGAGATTCGTTTTCC      | 20     | 58 | 50  |
| <i>CHD6</i>         | 20             | 59 | 60  | AGACACCCTGCAAGGACACC      | 22     | 60 | 50  |
| <i>CHD7</i>         | 19             | 58 | 58  | TCGTGCTCGGGAAGTATCG       | 20     | 59 | 60  |
| <i>CRMP1</i>        | 21             | 58 | 48  | GAACAAGGGATTCCTCCAAAAC    | 20     | 58 | 55  |
| <i>H6PD</i>         | 24             | 60 | 46  | GGTGGATAGATGCAGAAACAAGGA  | 27     | 60 | 41  |
| <i>JARID2exon5</i>  | 26             | 60 | 42  | GTGTATTTTGAAGCTCTCAGGATGA | 23     | 59 | 43  |
| <i>JMJD1A/KDM3A</i> | 26             | 58 | 38  | AGGTGACAAAACTTAGTTGGTTCAG | 21     | 58 | 38  |
| <i>JMJD1C</i>       | 20             | 59 | 60  | CATCCTCCGATCTGGGTCAG      | 21     | 58 | 52  |
| <i>SMARCA2</i>      | 19             | 59 | 58  | ATCGGTGGGTGGACATGGT       | 20     | 60 | 50  |
| <i>CDH2</i>         | 20             | 59 | 60  | GGGACTCGCACCAGGAGTAA      | 20     | 59 | 60  |
| <i>DCX</i>          | 20             | 60 | 65  | GAGAGGGAGGCACTCTTGGC      | 24     | 59 | 38  |
| <i>GRIK2</i>        | 20             | 58 | 60  | GCAGAAGGCAGTCAGTGCTG      | 22     | 58 | 45  |
| <i>NRXN1</i>        | 19             | 59 | 63  | GAGAGGGTGCCAGGAAAGG       | 21     | 59 | 48  |
| <i>NRXN1</i>        | 21             | 59 | 52  | TTAACGATGCCCTACAGGTG      | 21     | 59 | 57  |
| <i>SNTG2</i>        | 21             | 58 | 52  | GGAGATGAGGATGACCCAACA     | 25     | 60 | 40  |
| <i>SHANK3</i>       | 21             | 59 | 57  | AGCCTATCATGTGGACCCCTC     | 20     | 59 | 50  |
| <i>PI4KA</i>        | 20             | 58 | 55  | GGGCTGACCTGAAACACACA      | 22     | 59 | 45  |
| <i>GRIK3</i>        | 22             | 59 | 55  | GCCTCCTCCCAATAAGTAAGG     | 21     | 59 | 62  |
| <i>STXBP1</i>       | 21             | 59 | 57  | ACGACCTGTGGATAGCACTGC     | 22     | 59 | 45  |
| <i>IL1RAPL1</i>     | 22             | 59 | 54  | GGTCTGGAGACTTTGAAGAGC     | 21     | 59 | 62  |
| <i>MEFC2</i>        | 24             | 58 | 42  | GACCTTCAAATGGGAAGAAATACC  | 30     | 58 | 27  |
| <i>NEFM</i>         | 24             | 59 | 46  | CTTAGAAAACCTCTGGAGGGTGAA  | 24     | 59 | 46  |
| <i>FREM2</i>        | 20             | 58 | 60  | CCTCCGCCTCATAAGGAGTG      | 20     | 59 | 55  |
| <i>MAP2</i>         | 23             | 60 | 52  | AACCAAGCCTTGTAGTACCTGGC   | 23     | 59 | 48  |
| <i>UBE2A</i>        | 20             | 59 | 60  | CATCCTGGCTGGTCCTTCAC      | 21     | 59 | 43  |

## Reverse primer

| Sequence                       |
|--------------------------------|
| CGGATAATGGTTGCACTGGC           |
| TGTGTTTTACCAGAGAGCCC           |
| TTTTGTTTCCCCTCCAGGTG           |
| GCTTGAAATGGGCTTCTGTCTG         |
| GGTGAGTTTCAGGGTGTCCG           |
| TCACAAGCTGGTACGATGGC           |
| TATGAATGTGTAAGTCTGCTGGAGGTCTT  |
| ACTGGCATGAAGATGAAGCATTG        |
| TTTGATGCTGGGTTTCCATT           |
| ACAGTGGGAAAGGCTTTCTCC          |
| TGCTGGCAAAGACAAAGGG            |
| ACACACTCGCAGACGCTCAC           |
| TGTATTTAGCCCGAAGTTCCAATT       |
| TTACAGTTCGCTGGGTAACAA          |
| GCTTCTTTCAAGGGTCCGA            |
| CTGCGTTGGTACTCTTCTGC           |
| TGCTAATATTTCACTCCCTGGTTCA      |
| AAGAGCAAACCCAGCAGGTG           |
| TGAAGTACAAACATTGGGCTGG         |
| CCTAACCTCTCTCCGAGCTGC          |
| CCAGAGTGAACGCATCATCAAT         |
| GGCGTAGAGACCACTGTCCTG          |
| AAATGACATTCCACTTAAATAACAGATGAT |
| CCTTGGGTTTCTGAATCTTACTGG       |
| CAGATGGCAGCAGCAGAAGA           |
| GCAACTAAACCCCACTCATCCTT        |
| TCCCATGCCTCCTTCAAAT            |
